# Supplementary material for: Genesis of the Early Indosinian Darongshan Granitoid in South China: Response to the Subduction of the Eastern Paleo-Tethys Ocean
Source: Hindawi journal article supplement (doi:10.1155/2024/2387180), 2024-01-25
Supplement: f1 [file 2387180.f1.docx]

| Table S1. Major elements(%) and trace and rare earth elements(ppm) of the Darongshan granitoid | | | | | | | | | | | | | | | | |
| --- | --- | --- | --- | --- | --- | --- | --- | --- | --- | --- | --- | --- | --- | --- | --- | --- |
| Sample number | Rock type | SiO2 | TiO2 | Al2O3 | Fe2O3T | MnO | MgO | CaO | Na2O | K2O | P2O5 | LOI | SUM | A/CNK | A/NK | Mg # |
| YK040 | Granite | 68.40 | 0.23 | 16.48 | 1.77 | 0.02 | 1.39 | 0.67 | 5.43 | 3.31 | 0.16 | 1.45 | 99.31 | 1.20 | 1.32 | 69.64 |
| YK026 | Granite | 65.68 | 0.38 | 17.55 | 2.51 | 0.03 | 2.28 | 0.93 | 4.72 | 2.45 | 0.15 | 2.81 | 99.49 | 1.45 | 1.68 | 73.31 |
| YK035 | Granite | 67.84 | 0.32 | 16.46 | 2.72 | 0.03 | 2.20 | 0.85 | 5.08 | 2.36 | 0.18 | 1.53 | 99.56 | 1.32 | 1.51 | 70.85 |
| YK039 | Granite | 69.74 | 0.38 | 15.13 | 2.53 | 0.02 | 1.98 | 0.95 | 4.92 | 2.46 | 0.22 | 1.08 | 99.41 | 1.21 | 1.41 | 70.10 |
| YK049 | Granite | 66.16 | 0.47 | 15.75 | 3.25 | 0.04 | 2.21 | 1.48 | 5.48 | 2.68 | 0.17 | 1.53 | 99.23 | 1.08 | 1.32 | 66.92 |
| YK050 | Granite | 67.24 | 0.41 | 15.89 | 2.97 | 0.03 | 2.37 | 1.36 | 5.08 | 2.72 | 0.15 | 0.96 | 99.19 | 1.15 | 1.41 | 70.42 |
| YK051 | Granite | 68.08 | 0.40 | 15.36 | 3.15 | 0.03 | 2.50 | 0.73 | 4.10 | 2.33 | 0.15 | 2.44 | 99.27 | 1.45 | 1.66 | 70.78 |
| YK021-1 | Granite | 70.60 | 0.11 | 15.29 | 1.06 | 0.02 | 0.20 | 0.66 | 6.58 | 3.58 | 0.15 | 1.16 | 99.41 | 0.96 | 1.04 | 35.60 |
| YK022 | Granite | 72.37 | 0.11 | 15.68 | 0.40 | 0.00 | 0.26 | 0.35 | 5.50 | 3.67 | 0.11 | 1.15 | 99.60 | 1.15 | 1.21 | 65.41 |
| YK020 | Granite-porphyry | 67.19 | 0.34 | 15.33 | 2.19 | 0.03 | 1.31 | 1.56 | 5.89 | 3.18 | 0.13 | 2.26 | 99.41 | 0.96 | 1.17 | 63.58 |
| YK430 | Granite-porphyry | 70.23 | 0.59 | 13.58 | 4.87 | 0.05 | 1.75 | 1.29 | 1.86 | 3.67 | 0.18 | 1.66 | 99.73 | 1.45 | 1.93 | 52.54 |
| YK018-2 | Granite-porphyry | 70.31 | 0.61 | 13.28 | 4.58 | 0.05 | 1.67 | 1.65 | 2.08 | 3.73 | 0.17 | 0.74 | 98.87 | 1.27 | 1.78 | 52.89 |
| YK037 | Granite | 72.56 | 0.07 | 17.62 | 1.21 | 0.05 | 0.21 | 0.11 | 0.46 | 3.63 | 0.15 | 3.46 | 99.54 | 3.61 | 3.77 | 35.12 |
| YK043 | Granite | 71.03 | 0.26 | 14.92 | 2.37 | 0.03 | 0.78 | 1.04 | 2.41 | 4.93 | 0.21 | 1.24 | 99.20 | 1.33 | 1.60 | 49.54 |
| YK044-1 | Granite | 71.31 | 0.50 | 13.61 | 3.94 | 0.03 | 1.35 | 0.92 | 1.86 | 3.92 | 0.22 | 1.44 | 99.11 | 1.51 | 1.86 | 51.32 |
| YK036 | Granite | 73.33 | 0.27 | 13.19 | 2.64 | 0.03 | 0.67 | 0.99 | 2.26 | 5.20 | 0.22 | 0.95 | 99.76 | 1.18 | 1.41 | 43.10 |
| YK038 | Granite | 71.29 | 0.57 | 13.95 | 4.57 | 0.04 | 1.74 | 0.62 | 1.36 | 2.70 | 0.12 | 2.94 | 99.89 | 2.22 | 2.71 | 54.51 |
| YK431 | Granite | 69.33 | 0.62 | 14.19 | 5.02 | 0.06 | 1.86 | 1.42 | 1.92 | 3.70 | 0.19 | 1.39 | 99.69 | 1.46 | 1.98 | 53.31 |
| YK432 | Granite | 72.23 | 0.61 | 13.08 | 4.46 | 0.03 | 1.57 | 0.68 | 1.22 | 3.78 | 0.07 | 2.09 | 99.83 | 1.78 | 2.14 | 52.20 |
| YK433 | Granite | 72.91 | 0.59 | 12.54 | 4.49 | 0.03 | 1.66 | 0.99 | 1.53 | 3.36 | 0.10 | 1.64 | 99.84 | 1.58 | 2.04 | 53.44 |

Table S1 (*Continued*)

| Cr | Ni | Rb | Sr | Y | Zr | Nb | Cs | Ba | La | Ce | Pr | Nd | Sm | Eu | Gd | Tb | Dy | Ho | Er | Tm | Yb |
| --- | --- | --- | --- | --- | --- | --- | --- | --- | --- | --- | --- | --- | --- | --- | --- | --- | --- | --- | --- | --- | --- |
| 21.53 | 9.96 | 214.53 | 99.71 | 26.37 | 68.50 | 10.10 | 13.08 | 985.20 | 37.74 | 75.39 | 8.64 | 32.25 | 7.20 | 1.26 | 6.07 | 0.88 | 5.17 | 0.99 | 2.70 | 0.39 | 2.49 |
| 38.09 | 15.30 | 187.27 | 77.70 | 20.95 | 136.55 | 12.94 | 14.61 | 496.98 | 35.73 | 70.13 | 8.31 | 30.64 | 6.82 | 0.97 | 5.48 | 0.77 | 4.29 | 0.77 | 2.01 | 0.29 | 1.88 |
| 24.97 | 11.63 | 198.25 | 64.70 | 33.54 | 70.70 | 13.42 | 14.62 | 257.56 | 38.10 | 76.78 | 9.19 | 34.08 | 7.69 | 0.76 | 6.95 | 1.09 | 6.45 | 1.21 | 3.20 | 0.44 | 2.65 |
| 32.65 | 13.66 | 199.14 | 63.61 | 35.40 | 83.63 | 16.29 | 12.75 | 304.48 | 38.02 | 78.60 | 9.42 | 34.63 | 8.50 | 0.80 | 7.41 | 1.16 | 6.96 | 1.37 | 3.52 | 0.49 | 3.01 |
| 37.02 | 15.88 | 186.84 | 102.07 | 31.87 | 101.87 | 13.09 | 9.79 | 699.73 | 43.51 | 90.16 | 10.04 | 37.29 | 8.53 | 1.25 | 7.08 | 1.04 | 6.15 | 1.19 | 3.41 | 0.50 | 3.26 |
| 36.34 | 16.38 | 178.25 | 90.31 | 25.78 | 59.18 | 11.43 | 10.79 | 640.29 | 37.17 | 75.16 | 8.89 | 31.80 | 6.99 | 1.13 | 5.85 | 0.86 | 5.06 | 0.97 | 2.62 | 0.38 | 2.38 |
| 61.75 | 26.10 | 155.00 | 79.33 | 28.95 | 112.86 | 12.49 | 8.11 | 547.86 | 39.21 | 78.28 | 8.96 | 31.28 | 7.32 | 1.14 | 6.16 | 0.91 | 5.53 | 1.07 | 3.02 | 0.46 | 3.01 |
| 3.22 | 1.39 | 341.27 | 49.80 | 26.14 | 83.69 | 8.42 | 14.09 | 413.58 | 20.85 | 42.95 | 4.99 | 18.29 | 4.46 | 0.60 | 4.61 | 0.78 | 4.81 | 0.98 | 2.68 | 0.37 | 2.28 |
| 1.85 | 0.78 | 319.72 | 53.85 | 32.21 | 102.49 | 6.79 | 14.87 | 343.05 | 25.93 | 54.01 | 6.17 | 22.72 | 5.30 | 0.71 | 5.40 | 0.91 | 5.81 | 1.14 | 3.20 | 0.48 | 2.96 |
| 15.84 | 7.94 | 177.70 | 69.72 | 34.22 | 50.24 | 11.71 | 5.84 | 680.52 | 38.38 | 77.91 | 8.94 | 33.04 | 7.79 | 0.89 | 6.63 | 1.03 | 6.34 | 1.22 | 3.28 | 0.46 | 2.81 |
| 64.48 | 38.65 | 194.50 | 100.12 | 23.72 | 108.93 | 12.65 | 9.92 | 561.90 | 35.45 | 72.01 | 7.99 | 28.94 | 6.71 | 1.13 | 5.63 | 0.89 | 5.00 | 0.93 | 2.50 | 0.35 | 2.23 |
| 58.99 | 24.79 | 201.11 | 100.14 | 29.60 | 146.51 | 13.35 | 12.07 | 607.16 | 42.04 | 85.21 | 9.92 | 36.98 | 8.54 | 1.15 | 6.92 | 1.00 | 5.76 | 1.04 | 2.75 | 0.40 | 2.54 |
| 3.47 | 1.19 | 355.72 | 63.92 | 28.92 | 84.87 | 10.73 | 14.78 | 95.75 | 10.70 | 22.44 | 2.74 | 9.89 | 2.40 | 0.24 | 3.16 | 0.68 | 4.85 | 1.10 | 3.31 | 0.51 | 3.40 |
| 24.44 | 11.42 | 273.93 | 68.18 | 26.62 | 62.84 | 9.49 | 14.44 | 554.27 | 32.99 | 68.45 | 7.81 | 28.19 | 6.38 | 0.96 | 5.96 | 0.91 | 5.36 | 1.00 | 2.70 | 0.38 | 2.28 |
| 46.38 | 19.62 | 209.69 | 94.94 | 25.85 | 111.25 | 13.39 | 16.49 | 490.35 | 40.79 | 83.33 | 9.69 | 35.09 | 7.95 | 1.08 | 6.22 | 0.91 | 5.22 | 0.96 | 2.55 | 0.36 | 2.32 |
| 9.19 | 7.17 | 246.17 | 48.45 | 37.96 | 87.59 | 8.49 | 4.49 | 160.53 | 25.88 | 55.05 | 6.41 | 24.48 | 5.94 | 0.59 | 6.10 | 1.06 | 6.91 | 1.49 | 4.30 | 0.66 | 4.20 |
| 56.97 | 34.61 | 126.79 | 40.98 | 20.59 | 137.92 | 11.47 | 3.60 | 380.96 | 33.52 | 68.98 | 7.95 | 28.87 | 6.23 | 0.96 | 4.86 | 0.73 | 4.11 | 0.81 | 2.30 | 0.36 | 2.46 |
| 58.93 | 41.13 | 178.46 | 100.25 | 24.27 | 94.62 | 11.63 | 3.89 | 621.91 | 30.56 | 62.26 | 6.86 | 24.10 | 5.51 | 1.15 | 5.07 | 0.84 | 4.87 | 0.95 | 2.60 | 0.39 | 2.46 |
| 56.38 | 39.47 | 188.41 | 60.90 | 12.79 | 123.50 | 12.06 | 3.05 | 693.42 | 39.13 | 80.65 | 9.51 | 34.08 | 7.49 | 0.94 | 5.49 | 0.73 | 3.28 | 0.52 | 1.22 | 0.15 | 0.95 |
| 49.53 | 37.89 | 169.58 | 58.76 | 14.21 | 165.97 | 11.64 | 2.71 | 479.29 | 39.46 | 79.74 | 9.10 | 31.42 | 6.79 | 0.85 | 5.19 | 0.72 | 3.48 | 0.57 | 1.25 | 0.15 | 0.87 |

Table S1 (*Continued*)

| Lu | Hf | Ta | Pb | Th | U | Eu/Eu* | La/YbN | LREE/HREE | ∑LREE | ∑HREE+Y | ∑REE |
| --- | --- | --- | --- | --- | --- | --- | --- | --- | --- | --- | --- |
| 0.35 | 2.11 | 0.93 | 32.24 | 21.09 | 3.66 | 0.58 | 10.87 | 8.53 | 162.48 | 19.04 | 181.52 |
| 0.27 | 4.07 | 1.21 | 26.21 | 21.03 | 2.97 | 0.49 | 13.63 | 9.68 | 152.60 | 15.76 | 168.36 |
| 0.35 | 2.29 | 1.02 | 19.25 | 22.90 | 18.71 | 0.32 | 10.31 | 7.46 | 166.60 | 22.34 | 188.94 |
| 0.41 | 2.82 | 1.35 | 22.23 | 23.87 | 4.93 | 0.31 | 9.06 | 6.99 | 169.97 | 24.33 | 194.30 |
| 0.48 | 3.23 | 1.05 | 33.42 | 22.30 | 3.68 | 0.49 | 9.57 | 8.26 | 190.77 | 23.10 | 213.88 |
| 0.33 | 1.97 | 0.95 | 25.14 | 19.77 | 3.65 | 0.54 | 11.18 | 8.74 | 161.14 | 18.44 | 179.58 |
| 0.43 | 3.49 | 1.09 | 24.16 | 19.02 | 5.36 | 0.52 | 9.34 | 8.07 | 166.19 | 20.60 | 186.79 |
| 0.30 | 3.12 | 1.10 | 28.60 | 15.76 | 6.58 | 0.40 | 6.55 | 5.48 | 92.13 | 16.83 | 108.95 |
| 0.40 | 3.67 | 0.84 | 26.54 | 21.23 | 4.17 | 0.41 | 6.28 | 5.66 | 114.84 | 20.30 | 135.14 |
| 0.38 | 1.92 | 1.21 | 64.23 | 27.26 | 15.04 | 0.38 | 9.79 | 7.53 | 166.95 | 22.17 | 189.12 |
| 0.33 | 3.48 | 0.57 | 27.22 | 16.32 | 3.17 | 0.56 | 11.40 | 8.52 | 152.23 | 17.86 | 170.09 |
| 0.37 | 4.43 | 1.07 | 26.61 | 25.94 | 5.30 | 0.46 | 11.87 | 8.85 | 183.84 | 20.78 | 204.62 |
| 0.50 | 3.53 | 2.26 | 29.69 | 9.75 | 12.94 | 0.27 | 2.26 | 2.76 | 48.41 | 17.51 | 65.92 |
| 0.31 | 2.19 | 0.84 | 32.79 | 20.04 | 4.86 | 0.48 | 10.38 | 7.66 | 144.78 | 18.90 | 163.68 |
| 0.33 | 3.38 | 1.30 | 28.83 | 20.66 | 4.96 | 0.47 | 12.61 | 9.43 | 177.93 | 18.87 | 196.80 |
| 0.60 | 2.85 | 0.22 | 31.15 | 17.63 | 5.75 | 0.30 | 4.42 | 4.67 | 118.35 | 25.32 | 143.67 |
| 0.38 | 4.20 | 0.51 | 23.00 | 14.27 | 2.87 | 0.53 | 9.77 | 9.15 | 146.51 | 16.01 | 162.52 |
| 0.37 | 2.91 | 0.46 | 22.50 | 12.89 | 3.44 | 0.67 | 8.91 | 7.43 | 130.44 | 17.55 | 147.99 |
| 0.14 | 3.69 | 0.40 | 26.43 | 22.75 | 2.92 | 0.45 | 29.55 | 13.77 | 171.80 | 12.48 | 184.28 |
| 0.12 | 5.11 | 0.40 | 23.72 | 19.41 | 2.79 | 0.44 | 32.53 | 13.55 | 167.36 | 12.35 | 179.71 |

| Table S2. Zircon U-Th-Pb isotopic analysis of the Darongshan granitoid in southeastern Guangxi | | | | | | | | | | | | | | | |
| --- | --- | --- | --- | --- | --- | --- | --- | --- | --- | --- | --- | --- | --- | --- | --- |
| Spot | ppm | | | Isotope ratio | | | | | | Age/Ma | | | | | |
| Pb | Th | U | 207Pb/206Pb | 1σ | 207Pb/235U | 1σ | 206Pb/238U | 1σ | 207Pb/206Pb | 1σ | 207Pb/235U | 1σ | 206Pb/238U | 1σ |
| 1 | 25 | 134 | 581 | 0.0517 | 0.0012 | 0.2782 | 0.0066 | 0.0391 | 0.0004 | 272 | 52 | 249 | 5 | 247 | 2 |
| 2 | 48 | 165 | 1124 | 0.0527 | 0.0009 | 0.293 | 0.0055 | 0.0403 | 0.0004 | 317 | 37 | 261 | 4 | 255 | 3 |
| 3 | 26 | 121 | 616 | 0.0536 | 0.0014 | 0.2826 | 0.0077 | 0.0382 | 0.0004 | 354 | 57 | 253 | 6 | 242 | 2 |
| 4 | 15 | 99 | 358 | 0.0538 | 0.0016 | 0.2847 | 0.0089 | 0.0384 | 0.0004 | 361 | 64 | 254 | 7 | 243 | 3 |
| 5 | 21 | 118 | 466 | 0.0556 | 0.0014 | 0.3058 | 0.0077 | 0.04 | 0.0005 | 435 | 56 | 271 | 6 | 253 | 3 |
| 6 | 135 | 687 | 625 | 0.0851 | 0.0011 | 1.7812 | 0.0261 | 0.1516 | 0.0012 | 1318 | 24 | 1039 | 10 | 910 | 7 |
| 7 | 19 | 147 | 419 | 0.0544 | 0.0015 | 0.2988 | 0.0081 | 0.0399 | 0.0004 | 391 | 63 | 265 | 6 | 252 | 3 |
| 8 | 23 | 130 | 532 | 0.0526 | 0.0013 | 0.2773 | 0.0068 | 0.0382 | 0.0003 | 322 | 56 | 249 | 5 | 242 | 2 |
| 9 | 80 | 390 | 222 | 0.1241 | 0.002 | 3.4734 | 0.0708 | 0.2026 | 0.0023 | 2017 | 28 | 1521 | 16 | 1189 | 12 |
| 10 | 19 | 121 | 425 | 0.056 | 0.0016 | 0.3001 | 0.0091 | 0.0388 | 0.0004 | 454 | 66 | 267 | 7 | 245 | 3 |
| 11 | 32 | 152 | 732 | 0.054 | 0.0012 | 0.2989 | 0.0071 | 0.0401 | 0.0004 | 372 | 48 | 266 | 6 | 253 | 3 |
| 12 | 20 | 136 | 435 | 0.0532 | 0.0015 | 0.293 | 0.0078 | 0.0401 | 0.0005 | 345 | 32 | 261 | 6 | 253 | 3 |
| 13 | 26 | 231 | 570 | 0.0571 | 0.0014 | 0.3177 | 0.0095 | 0.0403 | 0.0006 | 494 | 56 | 280 | 7 | 254 | 3 |
| 14 | 13 | 72 | 306 | 0.051 | 0.0019 | 0.2791 | 0.0102 | 0.0398 | 0.0003 | 239 | 83 | 250 | 8 | 251 | 2 |
| 15 | 74 | 192 | 1752 | 0.0528 | 0.0009 | 0.2891 | 0.0049 | 0.0397 | 0.0003 | 320 | 42 | 258 | 4 | 251 | 2 |
| 16 | 21 | 140 | 467 | 0.0538 | 0.0014 | 0.2969 | 0.0077 | 0.0401 | 0.0004 | 361 | 59 | 264 | 6 | 253 | 3 |
| 17 | 20 | 114 | 452 | 0.0573 | 0.0016 | 0.3097 | 0.0083 | 0.0393 | 0.0004 | 502 | 59 | 274 | 6 | 248 | 2 |
| 18 | 38 | 135 | 867 | 0.054 | 0.0009 | 0.3015 | 0.0053 | 0.0406 | 0.0004 | 369 | 39 | 268 | 4 | 256 | 3 |
| 19 | 24 | 126 | 549 | 0.0559 | 0.0017 | 0.3064 | 0.0095 | 0.0398 | 0.0004 | 456 | 67 | 271 | 7 | 252 | 2 |
| 20 | 13 | 76 | 298 | 0.0545 | 0.002 | 0.2942 | 0.0101 | 0.0394 | 0.0004 | 391 | 84 | 262 | 8 | 249 | 3 |
| 21 | 28 | 130 | 644 | 0.055 | 0.0012 | 0.3049 | 0.0074 | 0.0402 | 0.0005 | 409 | 48 | 270 | 6 | 254 | 3 |
| 22 | 13 | 82 | 299 | 0.0572 | 0.002 | 0.3137 | 0.0105 | 0.0399 | 0.0004 | 498 | 76 | 277 | 8 | 252 | 3 |
| 23 | 21 | 171 | 474 | 0.0568 | 0.0016 | 0.3068 | 0.0092 | 0.0392 | 0.0004 | 483 | 56 | 272 | 7 | 248 | 2 |
| 24 | 56 | 160 | 1290 | 0.0539 | 0.0011 | 0.3101 | 0.0084 | 0.0416 | 0.0006 | 369 | 46 | 274 | 7 | 263 | 4 |
| 25 | 17 | 127 | 378 | 0.0548 | 0.0016 | 0.302 | 0.0099 | 0.04 | 0.0005 | 406 | 67 | 268 | 8 | 253 | 3 |

| Table S3. Zircon Hf isotopic analysis of the Darongshan granitoid in southeastern Guangxi | | | | | | | | |
| --- | --- | --- | --- | --- | --- | --- | --- | --- |
| Spot | 176Lu/177Hf | 176Hf/177Hf | T/Ma | 176Hf/177Hf | 176Hf/177Hf | εHf(t) | TDM (Ga) | TDM2 (Ga) |
| YK037-4 | 0.001293 | 0.282108 | 249.4 | 0.282102 | 0.282617 | -18.2 | 1.62 | 2.41 |
| YK037-5 | 0.000697 | 0.282272 | 256 | 0.282269 | 0.282613 | -12.2 | 1.37 | 2.04 |
| YK037-8 | 0.001774 | 0.28228 | 248.8 | 0.282272 | 0.282617 | -12.2 | 1.40 | 2.04 |
| YK037-14 | 0.000605 | 0.2823 | 256 | 0.282297 | 0.282613 | -11.2 | 1.33 | 1.98 |
| YK037-17 | 0.001565 | 0.282333 | 247.8 | 0.282325 | 0.282618 | -10.4 | 1.32 | 1.92 |
| YK037-19 | 0.001281 | 0.282343 | 247.6 | 0.282337 | 0.282618 | -9.9 | 1.29 | 1.90 |
| YK037-22 | 0.001745 | 0.282345 | 246.7 | 0.282337 | 0.282619 | -10 | 1.31 | 1.90 |
| YK037-25 | 0.00146 | 0.282348 | 250.8 | 0.282341 | 0.282616 | -9.7 | 1.29 | 1.89 |
| YK021-1-2 | 0.00289 | 0.282165 | 254.8 | 0.282152 | 0.282614 | -16.4 | 1.61 | 2.30 |
| YK021-1-5 | 0.00204 | 0.282183 | 252.6 | 0.282174 | 0.282615 | -15.6 | 1.55 | 2.25 |
| YK021-1-7 | 0.00125 | 0.282222 | 252.3 | 0.282216 | 0.282615 | -14.1 | 1.46 | 2.16 |
| YK021-1-11 | 0.001265 | 0.282232 | 253.2 | 0.282226 | 0.282615 | -13.7 | 1.45 | 2.14 |
| YK021-1-12 | 0.001537 | 0.282312 | 253.4 | 0.282305 | 0.282615 | -11 | 1.35 | 1.97 |
| YK021-1-13 | 0.00215 | 0.282347 | 254.4 | 0.282337 | 0.282614 | -9.8 | 1.32 | 1.89 |
| YK021-1-16 | 0.001769 | 0.28235 | 253.5 | 0.282341 | 0.282614 | -9.7 | 1.30 | 1.88 |
| YK021-1-17 | 0.001587 | 0.28236 | 248.4 | 0.282353 | 0.282618 | -9.4 | 1.28 | 1.86 |
| YK021-1-18 | 0.002515 | 0.282361 | 256.4 | 0.282349 | 0.282613 | -9.3 | 1.31 | 1.87 |
| YK021-1-19 | 0.001042 | 0.282377 | 251.7 | 0.282373 | 0.282616 | -8.6 | 1.24 | 1.82 |
| YK021-1-23 | 0.002919 | 0.282384 | 247.7 | 0.282371 | 0.282618 | -8.8 | 1.29 | 1.82 |
| YK021-1-25 | 0.001728 | 0.282414 | 252.8 | 0.282406 | 0.282615 | -7.4 | 1.21 | 1.74 |
| Sample YK037 Zircon dating point reference Tian et al. 2021 | | | | |  |  |  |  |

| Table S4. Brief summary of the zircon U-Pb chronology data from Darongshan pluton | | | | | | |
| --- | --- | --- | --- | --- | --- | --- |
| Pluton | Rock type | Age used(Ma) | Method | εHf(t) | T2DM (Ga) | Reference |
| Darongshan | syenogranite | 250 | LA-ICPMS | -18.2 to -7.4 | 1.74-2.41 | This study |
| Pubei | cordierite biotite granite | 252 | LA-ICPMS |  |  | Li et al., 2017 |
| Juzhou | biotite monzogranite | 249 | LA-ICPMS |  |  | Li et al., 2017a |
| Juzhou | biotite granite | 250 | LA-ICPMS |  |  | Li et al., 2017a |
| Yongan | cordierite biotite monzogranite | 249 | LA-ICPMS |  |  | Huang et al., 2017 |
| Yongan | cordierite biotite granodiorite | 252 | LA-ICPMS | -18.9 to -8.6 | 1.83-2.32 | Yuan, 2016 |
| Darongshan | biotite K-feldspar granite;cordierite biotite monzogranite | 253 | LA-ICPMS | -11.6 to -5.5 | 1.63-2.02 | Wang et al., 2016 |
| Nali | granodiorite | 262 | LA-ICPMS | -17.8 to -9.9 | 1.59-2.20 | Li et al., 2016 |
| Darongshan | granite | 250 | SIMS | -28.6 to -1.8 |  | Jiao et al., 2015 |
| Juzhou | granite porphyry | 250 | SIMS | -31.9 to -6.7 |  | Jiao et al., 2015 |
| Napeng | monzogranite | 252 | LA-ICPMS |  |  | Li et al., 2017b |
| Napeng | monzogranite | 255 | LA-ICPMS | -16.9 to -3.4 | 1.50-1.81 | Tian et al., 2021a |
| Darongshan | biotite monzogranite | 250 | LA-ICPMS |  |  | Tian et al., 2021b |
| Nali | granite | 261 | LA-ICPMS |  |  | Jia et al., 2012 |
| Wangchong | granite | 254 | SHRIMP |  |  | Fang, 2012 |
| Juzhou | monzogranite | 230 | LA-ICPMS |  |  | Deng et al., 2004 |
| Darongshan | granite | 233 | LA-ICPMS |  |  | Deng et al., 2004 |
| Darongshan | granite | 233 | SHRIMP | -12 to -4.5 | 1.50-1.95 | Qi et al., 2007 |
| Juzhou | granite | 231 | SHRIMP | -10.9 to -5.8 |  | Qi et al., 2007 |
| Darongshan | granite | 250 | LA-ICPMS |  |  | Chen et al., 2011 |
| Darongshan | granite | 254 | LA-ICPMS |  |  | Chen et al., 2011 |
| Juzhou | cordierite biotite granite | 252 | LA-ICPMS |  |  | Gao et al., 2018 |

| Table S5. Experimentally suggested lowest MgO content at given SiO2 contents for MA magma | | | | | | | References |
| --- | --- | --- | --- | --- | --- | --- | --- |
| SiO2(%) | 52.00 | 55.00 | 60 | 62.50 | 65.00 | 67.50 | Deng et al., 2009;2010 |
| MgO(%) | 4.50 | 3.50 | 2.9 | 2.50 | 2.00 | 1.00 |

| Table S6. Brief summary of zircon Hf isotopic compositions in the Darongshan granitoid | | | | |
| --- | --- | --- | --- | --- |
| Pluton | Age (Ma) | εHf(t) | TDM2 (Ga) | Reference |
| Darongshan | 257 | -6.1 | 1.67 | Wang et al., 2016 |
| 255 | -5.9 | 1.66 |
| 254 | -5.8 | 1.65 |
| 257 | -5.5 | 1.63 |
| 257 | -11.6 | 2.02 |
| 260 | -5.6 | 1.64 |
| 257 | -6.7 | 1.71 |
| 257 | -6.4 | 1.69 |
| 257 | -5.9 | 1.66 |
| 257 | -6.0 | 1.67 |
| Yongan | 245 | -17.2 | 2.03 | Yuan, 2016 |
| 249 | -14.5 | 1.86 |
| 238 | -18.2 | 2.10 |
| 250 | -21.9 | 2.32 |
| 253 | -18.3 | 2.09 |
| 260 | -14.6 | 1.86 |
| 253 | -16.5 | 1.98 |
| 265 | -18.3 | 2.08 |
| 253 | -17.1 | 2.02 |
| 253 | -18.9 | 2.14 |
| 251 | -17.9 | 2.07 |
| 248 | -17.5 | 2.04 |
| 256 | -14.1 | 1.83 |
| 253 | -18.4 | 2.10 |
| 258 | -16.1 | 1.96 |
| Darongshan | 233 | -12.0 | 1.95 | Qi et al., 2007 |
| 233 | -11.8 | 1.94 |
| 233 | -11.5 | 1.92 |
| 233 | -11.5 | 1.92 |
| 233 | -11.4 | 1.92 |
| 233 | -10.8 | 1.88 |
| 233 | -10.6 | 1.87 |
| 233 | -8.8 | 1.76 |
| 233 | -4.5 | 1.50 |
| Nali | 263 | -15.3 | 1.86 | Li et al., 2016 |
| 261 | -11.2 | 1.66 |
| 260 | -13.6 | 1.78 |
| 262 | -11.7 | 1.68 |
| 269 | -13.8 | 1.79 |
| 267 | -8.8 | 1.62 |

Table S6 (*Continued*)

| Pluton | Age (Ma) | εHf(t) | TDM2 (Ga) | Reference |
| --- | --- | --- | --- | --- |
| Nali | 264 | -13.2 | 1.76 | Li et al., 2016 |
| 268 | -16.3 | 1.92 |
| 268 | -11.6 | 1.68 |
| 267 | -18.8 | 2.04 |
| 265 | -12.3 | 1.71 |
| 269 | -10.0 | 1.60 |
| 261 | -10.2 | 1.61 |
| 262 | -12.8 | 1.74 |
| 258 | -12.1 | 1.70 |
| 259 | -12.9 | 1.74 |
| 263 | -15.8 | 1.89 |
| 259 | -15.7 | 1.88 |
| 259 | -11.7 | 1.68 |
| 264 | -21.9 | 2.20 |
| 263 | -11.0 | 1.65 |
| 263 | -11.7 | 1.68 |
| 262 | -13.9 | 1.79 |
| 263 | -11.1 | 1.65 |
| 259 | -15.1 | 1.85 |
| 263 | -9.9 | 1.59 |
| 266 | -17.8 | 1.99 |
| 261 | -12.5 | 1.72 |
| 259 | -16.2 | 1.91 |
| 262 | -10.8 | 1.63 |
| Jiu zhou | 253 | -7.8 | 1.77 | Wang et al., 2018 |
| 253 | -7.6 | 1.76 |
| 253 | -24.9 | 2.84 |
| 253 | -9.5 | 1.87 |
| 253 | -12.4 | 2.06 |
| 253 | -6.6 | 1.69 |
| 253 | -11.7 | 2.02 |
| 253 | -9.1 | 1.85 |
| 253 | -19.1 | 2.53 |
| 253 | -15.7 | 2.27 |
| 253 | -11.3 | 1.90 |
| 253 | -4.6 | 1.57 |
| 253 | -10.3 | 1.93 |
| Darongshan | 250.6 | -12.1 | 2.05 | Jiao et al., 2015 |
| 250.6 | -10.7 | 1.96 |
| 250.6 | -10.4 | 1.93 |

Table S6 (*Continued*)

| Pluton | Age (Ma) | εHf(t) | TDM2 (Ga) | Reference |
| --- | --- | --- | --- | --- |
| Darongshan | 250.6 | -12.3 | 2.05 | Jiao et al., 2015 |
| 250.6 | -11.2 | 1.99 |
| 250.6 | -12.1 | 2.05 |
| 250.6 | -14.1 | 2.17 |
| 250.6 | -9.3 | 1.87 |
| 250.6 | -10.6 | 1.95 |
| 250.6 | -10.6 | 1.95 |
| 250.6 | -12.3 | 2.05 |
| 250.6 | -5.3 | 1.61 |
| 250.6 | -8.3 | 1.81 |
| 250.6 | -7.3 | 1.74 |
| 250.6 | -9.4 | 1.87 |
| 250.6 | -10.8 | 1.97 |
| 250.6 | -10.6 | 1.95 |
| 250.6 | -11.8 | 2.03 |
| 250.6 | -12.4 | 2.06 |
| 250.6 | -10.1 | 1.92 |
| 250.6 | -11.1 | 1.98 |
| 250.6 | -9.5 | 1.88 |
| 250.6 | -9.8 | 1.90 |
| 250.6 | -9.5 | 1.88 |
| 250.6 | -10.3 | 1.93 |
| 250.6 | -12.5 | 2.07 |
| 248.5 | -6.9 | 1.72 |
| 248.5 | -3.3 | 1.49 |
| 248.5 | -9.7 | 1.89 |
| 248.5 | -11.9 | 2.03 |
| 248.5 | -9.9 | 1.91 |
| 248.5 | -4.8 | 1.58 |
| 248.5 | -9.4 | 1.87 |
| 248.5 | -15 | 2.23 |
| 248.5 | -19.1 | 2.48 |
| 248.5 | -9 | 1.84 |
| 248.5 | -13.8 | 2.15 |
| 248.5 | -8.8 | 1.84 |
| 248.5 | -9.6 | 1.89 |
| 248.5 | -10.3 | 1.93 |
| 248.5 | -10.3 | 1.93 |
| 248.5 | -10.9 | 1.97 |

Table S6 (*Continued*)

| Pluton | Age (Ma) | εHf(t) | TDM2 (Ga) | Reference |
| --- | --- | --- | --- | --- |
| Darongshan | 248.5 | -9.3 | 1.87 | Jiao et al., 2015 |
| 248.5 | -8.9 | 1.84 |
| 248.5 | -10.4 | 1.94 |
| 248.5 | -9 | 1.85 |
| 248.5 | -9.9 | 1.90 |
| 248.5 | -8.7 | 1.83 |
| 248.5 | -9.4 | 1.87 |
| 248.5 | -9.9 | 1.90 |
| 248.5 | -13.2 | 2.11 |
| 248.5 | -7.5 | 1.75 |
| 248.5 | -5.7 | 1.64 |
| 248.5 | -5.8 | 1.65 |
| 248.5 | -6.9 | 1.72 |
| 248.5 | -10.5 | 1.94 |
| 248.5 | -9.8 | 1.90 |
| 248.5 | -9.8 | 1.90 |
| 248.5 | -10.7 | 1.96 |
| 248.5 | -12.5 | 2.06 |
| 248.5 | -10 | 1.91 |
| 248.5 | -8.8 | 1.84 |
| 248.5 | -7.5 | 1.75 |
| 249.4 | -7.5 | 1.76 |
| 249.4 | -8.6 | 1.82 |
| 249.4 | -11.2 | 1.98 |
| 249.4 | -6.9 | 1.71 |
| 249.4 | -9.1 | 1.86 |
| 249.4 | -11.4 | 2.00 |
| 249.4 | -9.8 | 1.90 |
| 249.4 | -7 | 1.72 |
| 249.4 | -1.8 | 1.39 |
| 249.4 | -7.7 | 1.77 |
| 249.4 | -10 | 1.91 |
| 249.4 | -8.7 | 1.83 |
| 249.4 | -7.8 | 1.78 |
| 249.4 | -8.6 | 1.82 |
| 249.4 | -10.9 | 1.97 |
| 249.4 | -8.2 | 1.80 |
| 249.4 | -7.5 | 1.76 |
| 249.4 | -12.2 | 2.05 |

Table S6 (*Continued*)

| Pluton | Age (Ma) | εHf(t) | TDM2 (Ga) | Reference |
| --- | --- | --- | --- | --- |
| Darongshan | 249.4 | -7.4 | 1.75 | Jiao et al., 2015 |
| 249.4 | -9.3 | 1.87 |
| 249.4 | -8.5 | 1.82 |
| 249.4 | -9.2 | 1.86 |
| 249.4 | -8.3 | 1.80 |
| 249.4 | -8.5 | 1.81 |
| 249.4 | -2.5 | 1.44 |
| 249.4 | -11.7 | 2.02 |
| 249.4 | -2.6 | 1.44 |
| 249.4 | -7.4 | 1.75 |
| 248.4 | -10.7 | 1.95 |
| 248.4 | -9.8 | 1.90 |
| 248.4 | -8.4 | 1.81 |
| 248.4 | -11.6 | 2.01 |
| 248.4 | -10.5 | 1.94 |
| 248.4 | -9.6 | 1.88 |
| 248.4 | -9.1 | 1.86 |
| 248.4 | -10 | 1.91 |
| 248.4 | -15.3 | 2.24 |
| 248.4 | -10 | 1.91 |
| 248.4 | -7.6 | 1.76 |
| 248.4 | -8.9 | 1.84 |
| 248.4 | -11.6 | 2.01 |
| 248.4 | -21.5 | 2.63 |
| 248.4 | -13.5 | 2.13 |
| 248.4 | -6.8 | 1.71 |
| 248.4 | -9.2 | 1.86 |
| 248.4 | -8.2 | 1.80 |
| 248.4 | -9 | 1.85 |
| 248.4 | -7 | 1.72 |
| 248.4 | -9.4 | 1.87 |
| 248.4 | -9.2 | 1.86 |
| 248.4 | -7.6 | 1.76 |
| 248.4 | -9.7 | 1.89 |

| Table S7. Brief summary of the whole-rock Sr and Nd isotopic compositions in the Darongshan pluton | | | |
| --- | --- | --- | --- |
| Rock type | (87Sr/86Sr)i | ƐNd(t) | Reference |
| granite | 0.7133 | -9.60 | Fang, 2012 |
| granite | 0.7160 | -9.00 |
| granite | 0.7119 | -9.70 |
| granite | 0.7136 | -9.50 |
| granite | 0.7144 | -9.20 |
| granite | 0.7209 | -10.80 |
| granite | 0.7086 | -9.40 |
| granite | 0.7173 | -10.40 |
| granite | 0.7272 | -12.70 | Qi et al., 2007 |
| granite | 0.7266 | -12.50 |
| granite | 0.7221 | -11.60 |
| granite | 0.7215 | -10.60 |
| granite | 0.7224 | -10.60 |
| granodiorite | 0.7270 | -12.70 | Li et al., 2016 |
| granodiorite | 0.7266 | -12.60 |
| granodiorite | 0.7252 | -12.20 |
| granodiorite | 0.7266 | -12.30 |
| granodiorite | 0.7231 | -12.10 |
| granodiorite | 0.7237 | -12.00 |
| granodiorite | 0.7232 | -12.10 |
| granodiorite | 0.7228 | -12.00 |
| granodiorite | 0.7254 | -11.90 |
| granite | 0.7162 | -10.23 | Qin et al., 2011 |
| granite | 0.7222 | -10.33 |
| granite | 0.7144 | -9.02 |
| granite | 0.7139 | -9.59 |

References

Chen, C. H., Hsieh, P. S., Lee, C. Y., & Zhou, H. W. (2011). Two episodes of the Indosinian thermal event on the South China Block: constraints from LA-ICPMS U–Pb zircon and electron microprobe monazite ages of the Darongshan S-type granitic suite. Gondwana Research, 19(4): 1008-1023. https://doi.org/10.1016/j.gr.2010.10.009

Deng, J. F., Liu, C., Feng, Y. F., Xiao, Q. H., Su, S. G., Zhao, G. C., Kong, W. Q., & Chao, W. Y. (2010). High magnesian andesitic/dioritic rocks (HMA) and magnesian andesitic/dioritic rocks (MA): Two igneous rock types related to oceanic subduction. Geology in China, 37(4), 1112–1118 (in Chinese with English abstract).

Deng, J. F., Flower, M. F. J., Liu, C., Mo, X. X., & Wu, Z. X. (2009). Nomeuclature, diagnosis and origin of high–magnesian andesites (HMA) and magnesian andesites(MA):A review from petrographic and experimental data. Geochimica et Cosmochimica Acta, 73(13–1), A279.

Deng, X. Y., Chen, Z. G., Li, X. H., & Liu, D.Y. (2004). SHRIMP U-Pb Zircon Dating of the Darongshan-Shiwandashan Granitoid Belt in Southeastern Guangxi, China, Geological Review, 50(4): 426-432(in Chinese with English abstract).

Fang, D., (2012). Geological, Geochemical Characteristics and Petrogenesis of the Wangchong Granitic Super Unit, Darongshan Area, Guangxi Province. Dissertation, East China University of Technology. (in Chinese with English abstract).

Gao, P., Zheng, Y. F., Chen, Y. X., Zhao, Z. F., & Xia, X. P. (2018). Relict zircon U-Pb age and O isotope evidence for reworking of Neoproterozoic crustal rocks in the origin of Triassic S-type granites in South China. Lithos, 300: 261-277. https://doi.org/10.1016/j.lithos.2017.11.036

Huang, C., Shen, R. W., Nan, Z. G., Fu, L. G., Liu, S., Cai, D. Z., Wen, H., & Yu, Y Z. (2017). Zircon U-Pb ages and geochemical characteristics of Early Indosinian Liuwanshan granites, Guangxi. Geological Bulletin of China, 36(2-3): 209-223 (in Chinese with English abstract).

Jia, X. H., Wang, X. D., Yang, W. Q., Niu, Z. J., & Zhou, D. (2012). LA-ICP-MS zircon U-Pb age of the Nali granite in Qinzhou area of southern Guangxi and its geological significance. Geological Bulletin China, 31: 82-89 (in Chinese with English abstract).

Jiao, S. J., Li, X. H., Huang, H. Q., & Deng, X. G. (2015). Metasedimentary melting in the formation of charnockite: Petrological and zircon U-Pb-Hf-O isotope evidence from the Darongshan S-type granitic complex in southern China. Lithos, 239: 217-233. https://doi.org/10.1016/j.lithos.2015.10.004

Li, J., Zhao, G., Johnston, S. T., Dong, S., Zhang, Y., Xin, Y., & Yu, Y. (2017a). Permo-Triassic structural evolution of the Shiwandashan and Youjiang structural belts, South China. Journal of Structural Geology, 100: 24-44. https://doi.org/10.1016/j.jsg.2017.05.004

Li, K., Sun, W. C., & Deng, F. (2017b). The Petrology, Geochemical Characteristics and Origin of the Napeng Granite Mass Formed in Indo-China Period in the West of Guangdong Province. Journal of Geomechanics, 23(3), 411-421. (in Chinese with English abstract).

Li, Y. J., Wei, J. H., Santosh, M., Tan, J., Fu, L. B., & Zhao, S. Q. (2016). Geochronology and petrogenesis of Middle Permian S-type granitoid in southeastern Guangxi Province, South China: Implications for closure of the Paleo-Tethys. Tectonophysics, 682: 1-16. https://doi.org/10.1016/j.tecto.2016.05.048

Qi, C. S., Deng, X. G., Li, W. X., Li, X. H., Yang, Y. H., & Xie, L. W., (2007). Origin of the Darongshan-Shiwandashan S-type granitoid belt from southeastern Guangxi: geochemical and Sr-Nd-Hf isotopic constraints. Acta Petrologica Sinica,23(2): 403-412 (in Chinese with English abstract).

Qin, X. F., Wang, Z. Q., Zhang, Y. L., Pan, L. Z., Hu, G., Zhou, F. S. (2011). Geochronology and geochemistry of Early Mesozoic acid volcanic rocks from Southwest Guangxi: Constraints on tectonic evolution of the southwestern segment of Qinzhou-Hangzhou joint belt. Acta Petrologica Sinica, 27, 794-808 (in Chinese with English abstract)

Tian, M. Y., Di Y. J., Wang S., & Jia Y. L. (2021a). Geochronology, Geochemical Characteristics and Genesis of Napeng Granite Biotite Monzogranite in Yunkai Area, Guangxi. Journal of Jilin University (Earth Science Edition), 51 (3): 749-766 (in Chinese with English abstract).

Tian, M. Y., Di, Y. J., Li, S.S., & Zhang, S. (2021b). Geochemical Characteristics and Genesis of Biotite Monzogranite in Southeastern Guangxi Province, South China. Earth Sciences, 10(6): 325-331. doi: 10.11648/j.earth.20211006.18

Wang, L., Long, W. G., Zhou, D., Xu, W. C., & Jin, X. B. (2016). Late Triassic zircon U-Pb ages and Sr-Nd-Hf isotopes of Darongshan granites in southeastern Guangxi and their geological implications. Geological Bulletin of China, 35(8): 1291-1303 (in Chinese with English abstract)

Yuan, Y. S. (2016). Geochemistry and Tectonic Setting of the Yong,an Granitoid Pluton in Southeastern Guangxi. Dissertation, China University of Geosciences (Beijing). (in Chinese with English abstract).
